# Supplementary material for: Economic Profitability of Carbon Sequestration of Fine-Aroma Cacao Agroforestry Systems in Amazonas, Peru
Source: MDPI journal article supplement (doi:10.3390/f15030500), 2024-03-08
Supplement: s1 [file s1]

**Supplementary Table S1:** Direct costs for cocoa management and maintenance in the area of research intervention

| Criteria for calculating the production and maintenance costs of the farm |                     |                     |             |                    | Base year              | Year 1                 | Year 2                 | Year 3                 | Year 4                 | Year 5                 |
|---------------------------------------------------------------------------|---------------------|---------------------|-------------|--------------------|------------------------|------------------------|------------------------|------------------------|------------------------|------------------------|
| A. Productivity Kg of cocoa/year                                          |                     |                     |             |                    | 94,811                 | 94,811                 | 94,811                 | 94,811                 | 94,811                 | 94,811                 |
| B. Total area of intervention (ha)                                        |                     |                     |             |                    | 104                    | 104                    | 104                    | 104                    | 104                    | 104                    |
| C. Unit cost per unit PEN/kg of dry cocoa                                 |                     |                     |             |                    | 3.91                   | 3.91                   | 3.91                   | 3.91                   | 3.91                   | 3.91                   |
|                                                                           |                     |                     |             |                    | Base year              | Year 1                 | Year 2                 | Year 3                 | Year 4                 | Year 5                 |
| Items                                                                     | Unit of measurement | Quantity per ha (F) | Total (B*F) | Unit price PEN (G) | Total cost PEN (G*B*F) |
| <b>Direct costs (D+E)</b>                                                 |                     |                     |             |                    | <b>371,110.33</b>      | <b>371,110.33</b>      | <b>371,110.33</b>      | <b>371,110.33</b>      | <b>371,110.33</b>      | <b>371,110.33</b>      |
| <b>D. Labor</b>                                                           |                     |                     |             |                    | <b>258,520.33</b>      | <b>258,520.33</b>      | <b>258,520.33</b>      | <b>258,520.33</b>      | <b>258,520.33</b>      | <b>258,520.33</b>      |
| Pruning                                                                   | Wage                | 11                  | 1164.45     | 50.00              | 58,222.64              | 58,222.64              | 58,222.64              | 58,222.64              | 58,222.64              | 58,222.64              |
| Weed control                                                              | Wage                | 12                  | 1251        | 50.00              | 62,550.00              | 62,550.00              | 62,550.00              | 62,550.00              | 62,550.00              | 62,550.00              |
| Shade management                                                          | Wage                | 4                   | 417.00      | 50.00              | 20,850.00              | 20,850.00              | 20,850.00              | 20,850.00              | 20,850.00              | 20,850.00              |
| Fertilizer application                                                    | Wage                | 4                   | 437.85      | 50.00              | 21,892.50              | 21,892.50              | 21,892.50              | 21,892.50              | 21,892.50              | 21,892.50              |
| Pest and disease control                                                  | Wage                | 5                   | 521.25      | 50.00              | 26,062.50              | 26,062.50              | 26,062.50              | 26,062.50              | 26,062.50              | 26,062.50              |
| Harvest                                                                   | Wage                | 13                  | 1378.85     | 50.00              | 68,942.69              | 68,942.69              | 68,942.69              | 68,942.69              | 68,942.69              | 68,942.69              |
| <b>E. Supplies</b>                                                        |                     |                     |             |                    | <b>112,590.00</b>      | <b>112,590.00</b>      | <b>112,590.00</b>      | <b>112,590.00</b>      | <b>112,590.00</b>      | <b>112,590.00</b>      |
| Island guano                                                              | Sack x 50 kg        | 18                  | 1877        | 60.00              | 112,590.00             | 112,590.00             | 112,590.00             | 112,590.00             | 112,590.00             | 112,590.00             |

**Supplementary Table S2.** Indirect costs for cocoa production

| Concept             | Unit of measurement | Quantity | Unit cost PEN | Total cost PEN    | Base year PEN    | Year 1 PEN      | Year 2 PEN        | Year 3 PEN       | Year 4 PEN      | Year 5 PEN      |
|---------------------|---------------------|----------|---------------|-------------------|------------------|-----------------|-------------------|------------------|-----------------|-----------------|
| <b>A. Tools</b>     |                     |          |               | <b>15,105.00</b>  | <b>10,600.00</b> | <b>6,890.00</b> | <b>6,890.00</b>   | <b>15,105.00</b> | <b>6,890.00</b> | <b>6,890.00</b> |
| Machetes            | Unidad              | 53.00    | 25.00         | 1,325.00          | 1,325.00         | 0.00            | 0.00              | 1,325.00         | 0.00            | 0.00            |
| Spikes              | Unidad              | 53.00    | 30.00         | 1,590.00          | 1,590.00         | 0.00            | 0.00              | 1,590.00         | 0.00            | 0.00            |
| Shovels             | Unidad              | 53.00    | 30.00         | 1,590.00          | 1,590.00         | 0.00            | 0.00              | 1,590.00         | 0.00            | 0.00            |
| Pruning shears      | Unidad              | 53.00    | 35.00         | 1,855.00          | 1,855.00         | 0.00            | 0.00              | 1,855.00         | 0.00            | 0.00            |
| Pod                 | Unidad              | 53.00    | 35.00         | 1,855.00          | 1,855.00         | 0.00            | 0.00              | 1,855.00         | 0.00            | 0.00            |
| Ear protection      | Unidad              | 53.00    | 45.00         | 2,385.00          | 2,385.00         | 2,385.00        | 2,385.00          | 2,385.00         | 2,385.00        | 2,385.00        |
| Helmet              | Unidad              | 53.00    | 50.00         | 2,650.00          | 0.00             | 2,650.00        | 2,650.00          | 2,650.00         | 2,650.00        | 2,650.00        |
| Leather gloves      | Unidad              | 53.00    | 35.00         | 1,855.00          | 0.00             | 1,855.00        | 1,855.00          | 1,855.00         | 1,855.00        | 1,855.00        |
| <b>A. Machinery</b> |                     |          |               | <b>95,400.00</b>  | <b>0.00</b>      | <b>0.00</b>     | <b>95,400.00</b>  | <b>0.00</b>      | <b>0.00</b>     | <b>0.00</b>     |
| motor mower         | Unidad              | 53       | 1,800.00      | 95,400.00         |                  |                 | 95,400.00         |                  |                 |                 |
| <b>TOTAL (A+B)</b>  |                     |          |               | <b>110,505.00</b> | <b>10,600.00</b> | <b>6,890.00</b> | <b>102,290.00</b> | <b>15,105.00</b> | <b>6,890.00</b> | <b>6,890.00</b> |

**Supplementary Table S3.** Administrative costs for cocoa production

| Concept                    | Unit of measurement | Quantity | Value monthly<br>PEN | Total annual<br>PEN | Year 0<br>PEN | Year 1<br>PEN | Year 2<br>PEN | Year 3<br>PEN | Year 4<br>PEN | Year 5<br>PEN |
|----------------------------|---------------------|----------|----------------------|---------------------|---------------|---------------|---------------|---------------|---------------|---------------|
| A. Human Resources         |                     |          | 89,200.00            | 49,600.00           | 89,200.00     | 89,200.00     | 89,200.00     | 89,200.00     | 89,200.00     | 89,200.00     |
| Manager                    | Month               | 12       | 3,000.00             | 36,000.00           | 36,000.00     | 36,000.00     | 36,000.00     | 36,000.00     | 36,000.00     | 36,000.00     |
| Administrative Assistant   | Month               | 12       | 1,100.00             | 13,200.00           | 13,200.00     | 13,200.00     | 13,200.00     | 13,200.00     | 13,200.00     | 13,200.00     |
| Field technician           | Month               | 12       | 1,800.00             | 21,600.00           | 0.00          | 21,600.00     | 21,600.00     | 21,600.00     | 21,600.00     | 21,600.00     |
| Responsible for collection | Month               | 12       | 1,500.00             | 18,000.00           | 0.00          | 18,000.00     | 18,000.00     | 18,000.00     | 18,000.00     | 18,000.00     |
| B. Stationery              |                     |          | 400.00               | 400.00              | 400.00        | 400.00        | 400.00        | 400.00        | 400.00        | 400.00        |
| Desk supplies              | Gbl                 | 1        | 400.00               | 400.00              | 400.00        | 400.00        | 400.00        | 400.00        | 400.00        | 400.00        |
| C. Basic services          |                     |          |                      |                     | 3,360.00      | 3,360.00      | 3,360.00      | 3,360.00      | 3,360.00      | 3,360.00      |
| Water                      | Month               | 12       | 100.00               | 1,200.00            | 1,200.00      | 1,200.00      | 1,200.00      | 1,200.00      | 1,200.00      | 1,200.00      |
| Light                      | Month               | 12       | 80.00                | 960.00              | 960.00        | 960.00        | 960.00        | 960.00        | 960.00        | 960.00        |
| Phone                      | Month               | 12       | 100.00               | 1,200.00            | 1200          | 1,200.00      | 1,200.00      | 1,200.00      | 1,200.00      | 1,200.00      |
| Totals (A+B+C)             |                     |          |                      | 52,960.00           | 92,560.00     | 92,560.00     | 92,560.00     | 92,560.00     | 92,560.00     | 52,960.00     |
